## Correction: PPAR $\gamma$ sumoylation-mediated lipid accumulation in lung cancer

**Ai N.H. Phan<sup>1,2</sup>, Vu T.A. Vo<sup>1,2</sup>, Tuyen N.M. Hua<sup>1,2</sup>, Min-Kyu Kim<sup>1,2</sup>, Se-Young Jo<sup>3</sup>, Jong-Whan Choi<sup>1</sup>, Hyun-Won Kim<sup>1</sup>, Jaekyoung Son<sup>3</sup>, Young-Ah Suh<sup>3</sup> and Yangsik Jeong<sup>1,2</sup>**

<sup>1</sup> Department of Biochemistry, Wonju College of Medicine, Yonsei University, Wonju, Gangwon-do, Republic of Korea

<sup>2</sup> Department of Global Medical Science, Institute of Lifestyle Medicine, Wonju College of Medicine, Yonsei University, Wonju, Gangwon-do, Republic of Korea

<sup>3</sup> Asan Institute for Life Sciences, Asan Medical Center, College of Medicine, University of Ulsan, Seoul, Songpa-gu, Republic of Korea

**Published:** February 15, 2019

**Copyright:** Phan et al. This is an open-access article distributed under the terms of the Creative Commons Attribution License 3.0 (CC BY 3.0), which permits unrestricted use, distribution, and reproduction in any medium, provided the original author and source are credited.

**This article has been corrected:** The correct Grant Support information is given below:

### GRANT SUPPORT

This study was financially supported by the Basic Science Research Program through the National Research Foundation of Korea funded by the Ministry of Education, Science and Technology (NRF-2016R1D1A3B03930581 to YS Jeong), Medical Research Center Program (2017R1A5A2015369), Yonsei University Future-leading Research Initiative of 2015 (RMS2-2015-22-0094), JJ-2017-1 to YS Jeong, and a grant of the Korea Health Technology R&D Project through the Korea Health Industry Development Institute (KHIDI), funded by the Ministry of Health & Welfare, Republic of Korea (HI17C0039).

Original article: Oncotarget. 2017; 8:82491-82505. <https://doi.org/10.18632/oncotarget.19700>
